# Supplementary material
Source: MDPI journal article supplement (https://www.mdpi.com/2073-4344/13/2/443)
Supplement: s1 [file s1]

## Supplementary Information

# Interaction of *Jania rubens* Polyphenolic Extract as an Antidiabetic Agent with $\alpha$ -Amylase, Lipase, and Trypsin: In Vitro Evaluations and In Silico Studies

Asmaa Nabil-Adam <sup>1,\*</sup>, Mohamed L. Ashour <sup>2,3</sup>, Tamer M. Tamer <sup>4</sup>, Mohamed A. Shreadah <sup>1</sup> and Mohamed A. Hassan <sup>5,6,\*</sup>

- <sup>1</sup> Marine Biotechnology and Natural Products Laboratory, National Institute of Oceanography & Fisheries, Cairo 11516, Egypt
- <sup>2</sup> Department of Pharmacognosy, Faculty of Pharmacy, Ain-Shams University, Abbasia, Cairo 11566, Egypt
- <sup>3</sup> Department of Pharmaceutical Sciences, Pharmacy Program, Batterjee Medical College, P.O. Box 6231, Jeddah 21442, Saudi Arabia
- <sup>4</sup> Polymer Materials Research Department, Advanced Technologies and New Materials Research Institute (ATNMRI), City of Scientific Research and Technological Applications (SRTA-City), New Borg El-Arab City, Alexandria 21934, Egypt
- <sup>5</sup> Protein Research Department, Genetic Engineering and Biotechnology Research Institute (GEBRI), City of Scientific Research and Technological Applications (SRTA-City), New Borg El-Arab City, Alexandria 21934, Egypt
- <sup>6</sup> University Medical Center Göttingen, Georg-August-University, 37073 Göttingen, Germany
- \* Correspondence: sama.biomarine@gmail.com (A.N.-A.); madel@srtacity.sci.eg (M.A.H.)

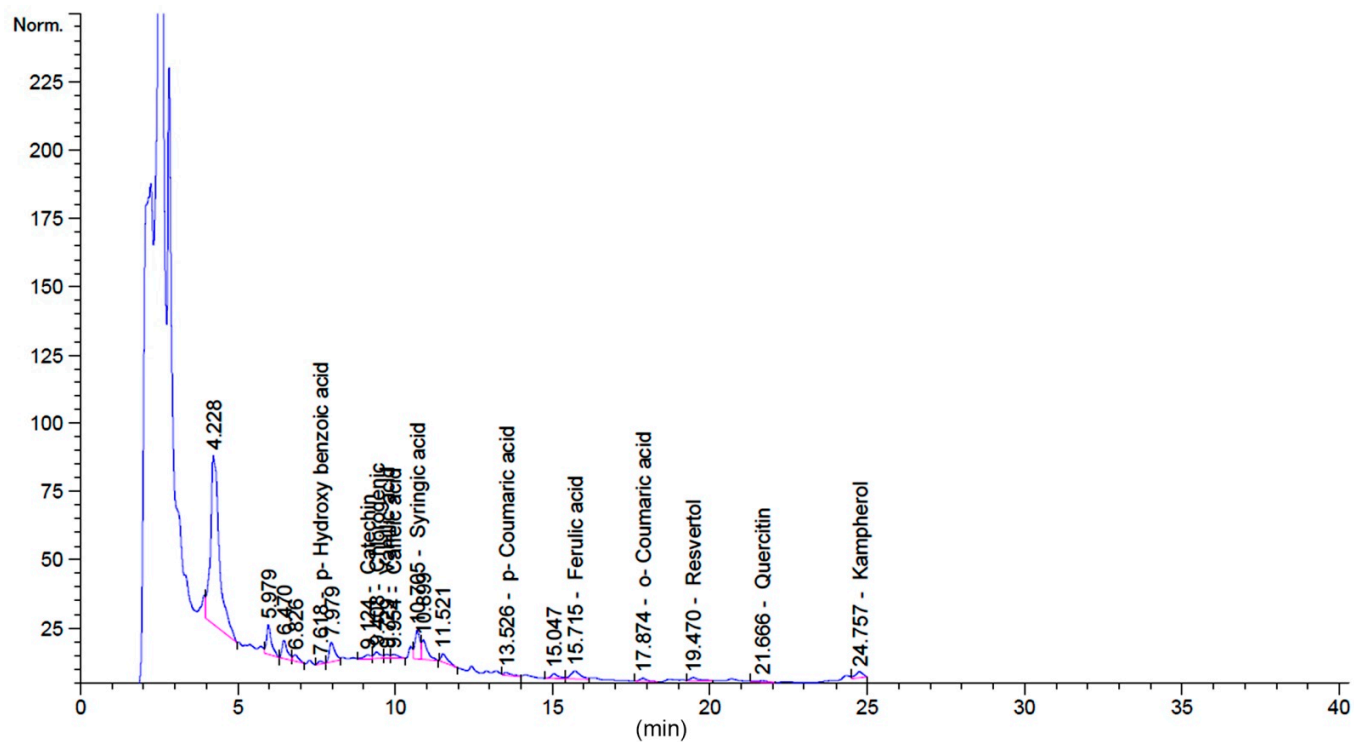

**Figure S1.** HPLC chromatogram for the JRPE shows different polyphenolic compounds (phenolic and flavonoids).

**Table S1.** The docking affinity scores of the different polyphenolics' compounds in the JRPE.

| Compounds                      | $\alpha$ -Amylase<br>Affinity | a.a residue                                                              | Lipase<br>Affinity | a.a residue                                                  | Trypsin<br>Affinity | a.a residue                                                 |
|--------------------------------|-------------------------------|--------------------------------------------------------------------------|--------------------|--------------------------------------------------------------|---------------------|-------------------------------------------------------------|
| <i>P</i> - Hydroxybenzoic acid | -5.3                          | TYR62 ,ARG195                                                            | -4.9               | SER195 ,CYS220 ,GLY226                                       | -5                  | SER195, CYS220 ,GLY226                                      |
| Caffeic acid                   | -5.7                          | TRP59 ,TYR62 ,GLN63<br>,ARG195 ,ASP197 ,GLU233                           | -4.7               | CYS42 ,HIS57 ,TYR59<br>,GLY193                               | -4.7                | CYS42, HIS57 ,TYR59<br>,GLY193                              |
| Catechin                       | -4.5                          | ARG267 ,ALA310 ,THR314<br>,ASP317 ,ARG346                                | -4.3               | SER195                                                       | -4.3                | SER195                                                      |
| Chlorogenic                    | -8                            | PRO4 ,THR6 ,ARG252<br>,SER289 ,PRO332 ,GLY334<br>,ASP402 ,GLY403 ,ARG421 | -7.1               | LEU18 ,HIS30 ,ILE33<br>,SER35 ,SER37 ,TYR55<br>,ILE79 ,THR80 | -7.1                | PHE41 ,TYR151 ,GLY193<br>SER195 ,GLY219                     |
| Ferulic acid                   | -6.1                          | TYR62 ,ASP197 ,HIS299                                                    | -5.3               | HIS57 ,SER190 ,CYS191<br>SER195 ,CYS220                      | -5.2                | HIS57 ,SER190 ,CYS191<br>,SER195 ,CYS220                    |
| Kaempferol                     | -8.4                          | TRP59, TYR62 ,GLN63<br>,GLU233                                           | -7.1               | HIS57 ,ASP189 ,SER190<br>,GLN192 ,GLY193 ,TRP215<br>,GLY216  | -7.2                | HIS57 ,ASP189 ,SER190<br>,GLN192 ,GLY193 ,TRP215<br>,GLY216 |
| <i>o</i> -Coumaric acid        | -5.8                          | TRP59, TYR62 ,HIS101                                                     | -4.7               | TYR59 ,THR90                                                 | -4.6                | TYR59 ,THR90                                                |
| <i>p</i> -Coumaric acid        | -5.7                          | TRP59, TYR62 ,GLN63<br>,ARG195                                           | -4.8               | ASN34 ,ARG62 ,GLN64<br>,ARG66                                | -4.3                | ASN34 ,ARG62, GLN64<br>,ARG66                               |
| Quercetin                      | -8.8                          | ARG252 ,PRO332 ,ARG398<br>,ASP402 ,ARG421                                | -7.4               | HIS57 ,TYR151 ,CYS191<br>,GLY193 ,ASP194<br>,SER195          | -7.2                | HIS57 ,TYR151 ,CYS191<br>,GLY193 ,ASP194 ,SER195            |
| Resveratrol                    | -7.4                          | TYR62 ,THR163 ,ASP197<br>,HIS299                                         | -6                 | HIS57 ,LEU99 ,SER214<br>,TRP215 ,GLY216                      | -5.8                | HIS57 ,LEU99 ,SER214<br>,TRP215 ,GLY216                     |
| Syringic acid                  | -5.8                          | ARG252 ,SER289 ,GLY334<br>,PHE335 ,ARG398                                | -4.9               | SER190 ,CYS191 ,GLY193<br>,SER195 ,GLY216 ,GLY219            | -5.5                | SER190 ,CYS191 ,GLY193<br>,SER195 ,GLY216 ,GLY219           |
| Vanillic acid                  | -5.4                          | ARG252 ,SER289 ,ASP290<br>,PRO332 ,GLY334 ,ARG398                        | -4.8               | LYS60 ,SER61 ,ARG62                                          | -4.1                | LYS60 ,SER61 ,ARG62                                         |

**Table S2.** Affinity scores for docking analysis of  $\alpha$ -amylase (PDB ID: 4W93) using twelve polyphenolic compounds identified from JRPE.

|                                                                                                                                                                                                                                         |                                                                                                                                                                                                              |
|-----------------------------------------------------------------------------------------------------------------------------------------------------------------------------------------------------------------------------------------|--------------------------------------------------------------------------------------------------------------------------------------------------------------------------------------------------------------|
| 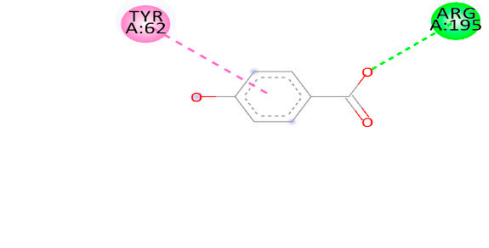 <p>Interactions</p> <ul style="list-style-type: none"> <li>Conventional Hydrogen Bond</li> <li>Pi-Pi Stacked</li> </ul>                               |  <p>Interactions</p> <ul style="list-style-type: none"> <li>Conventional Hydrogen Bond</li> <li>Pi-Pi Stacked</li> </ul>   |
| <p><b><i>P</i>-Hydroxybenzoic acid</b></p>                                                                                                                                                                                              | <p><b>Caffeic acid</b></p>                                                                                                                                                                                   |
|  <p>Interactions</p> <ul style="list-style-type: none"> <li>Conventional Hydrogen Bond</li> <li>Unfavorable Donor-Donor</li> <li>Pi-Allyl</li> </ul> |  <p>Interactions</p> <ul style="list-style-type: none"> <li>Conventional Hydrogen Bond</li> <li>Pi-Pi Stacked</li> </ul> |
| <p><b>Chlorogenic</b></p>                                                                                                                                                                                                               | <p><b>Vanillic acid</b></p>                                                                                                                                                                                  |

|                                                                                                                                                                                                                                                  |                                                                                                                                                                                                                                                                |
|--------------------------------------------------------------------------------------------------------------------------------------------------------------------------------------------------------------------------------------------------|----------------------------------------------------------------------------------------------------------------------------------------------------------------------------------------------------------------------------------------------------------------|
| 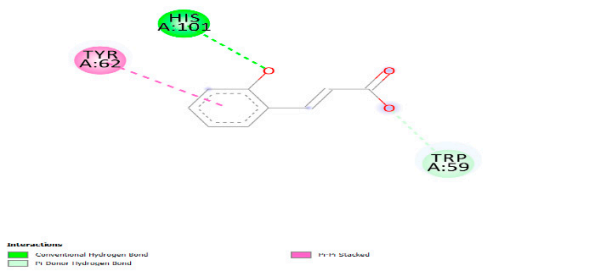 <p><b>Interactions</b></p> <ul style="list-style-type: none"> <li>Conventional Hydrogen Bond</li> <li>Pi-Donor Hydrogen Bond</li> <li>Pi-Pi Stacked</li> </ul> |  <p><b>Interactions</b></p> <ul style="list-style-type: none"> <li>Conventional Hydrogen Bond</li> <li>Pi-Pi Stacked</li> </ul>                                              |
| <p><b>O-Coumaric acid</b></p>                                                                                                                                                                                                                    | <p><b>P-Coumaric acid</b></p>                                                                                                                                                                                                                                  |
|  <p><b>Interactions</b></p> <ul style="list-style-type: none"> <li>Conventional Hydrogen Bond</li> <li>Pi-Cation</li> <li>Pi-Alkyl</li> </ul>                  |  <p><b>Interactions</b></p> <ul style="list-style-type: none"> <li>Conventional Hydrogen Bond</li> <li>Pi-Donor Hydrogen Bond</li> <li>Pi-Pi Stacked</li> </ul>             |
| <p><b>Catechin</b></p>                                                                                                                                                                                                                           | <p><b>Ferulic acid</b></p>                                                                                                                                                                                                                                     |
|  <p><b>Interactions</b></p> <ul style="list-style-type: none"> <li>Conventional Hydrogen Bond</li> <li>Pi-Pi Stacked</li> </ul>                               |  <p><b>Interactions</b></p> <ul style="list-style-type: none"> <li>Conventional Hydrogen Bond</li> <li>Carbon Hydrogen Bond</li> <li>Pi-Sigma</li> <li>Pi-Alkyl</li> </ul> |
| <p><b>Kaempferol</b></p>                                                                                                                                                                                                                         | <p><b>Quercetin</b></p>                                                                                                                                                                                                                                        |

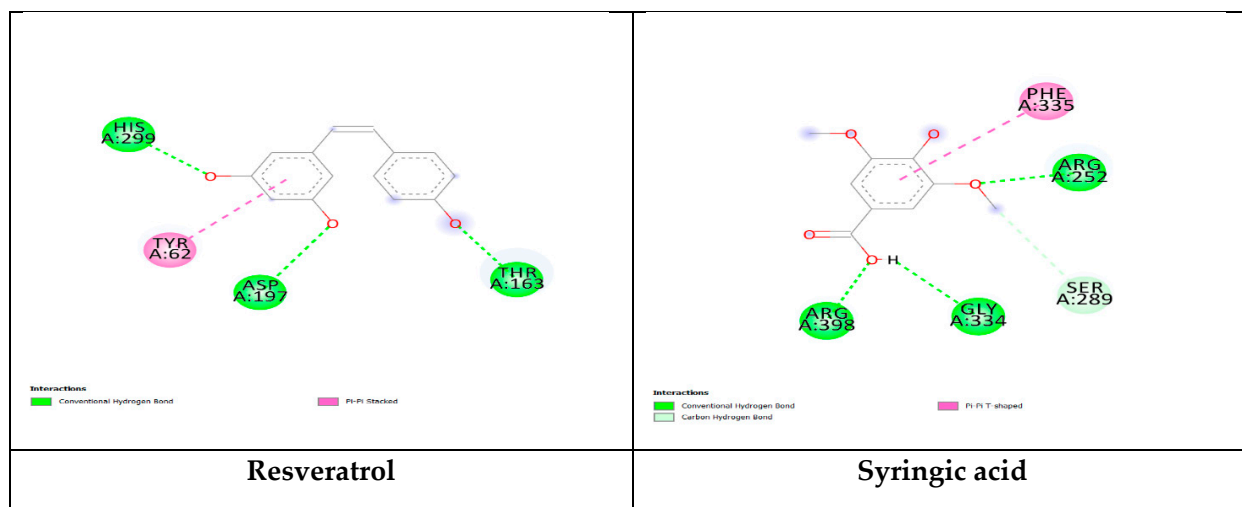

**Table S3.** Affinity scores for docking analysis of lipase (PDB ID: 1LPB) using twelve polyphenolic compounds identified from JRPE.

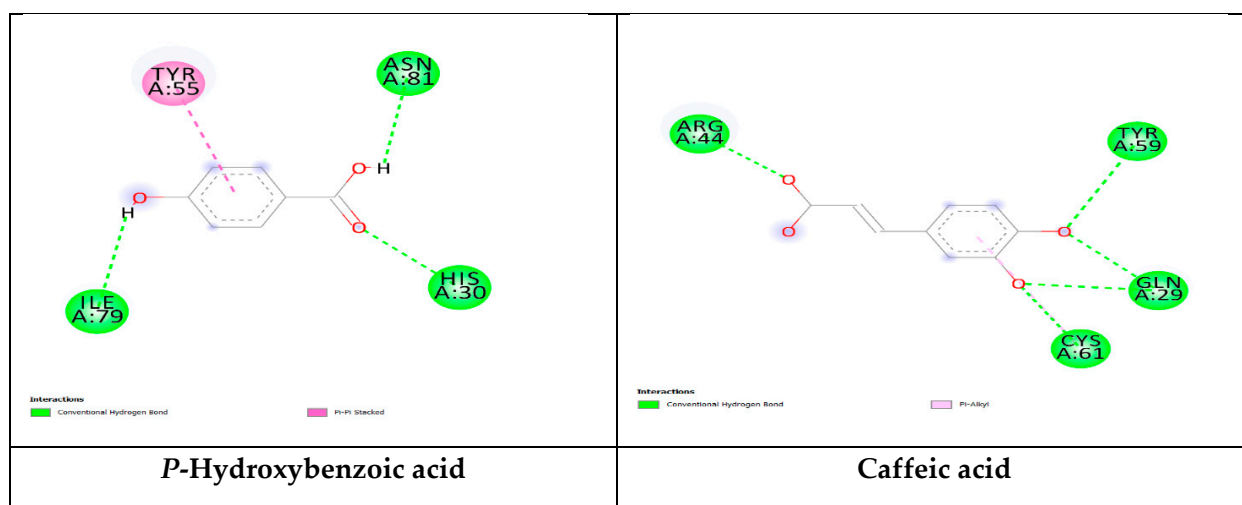

|                                                                                                                                                                                                                                 |                                                                                                                                                                                                                                                                       |
|---------------------------------------------------------------------------------------------------------------------------------------------------------------------------------------------------------------------------------|-----------------------------------------------------------------------------------------------------------------------------------------------------------------------------------------------------------------------------------------------------------------------|
| 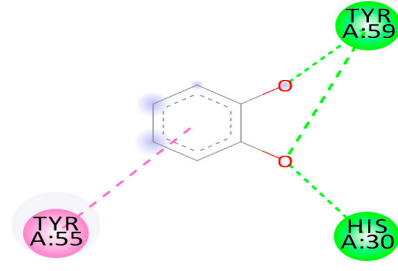 <p><b>Interactions</b></p> <ul style="list-style-type: none"> <li>Conventional Hydrogen Bond</li> <li>Pi-Pi Stacked</li> </ul>                |  <p><b>Interactions</b></p> <ul style="list-style-type: none"> <li>Conventional Hydrogen Bond</li> <li>Pi-Pi Stacked</li> </ul>                                                     |
| <p><b>Catechin</b></p>                                                                                                                                                                                                          | <p><b>P-coumaric acid</b></p>                                                                                                                                                                                                                                         |
|  <p><b>Interactions</b></p> <ul style="list-style-type: none"> <li>Conventional Hydrogen Bond</li> <li>Pi-Pi Stacked</li> </ul>               |  <p><b>Interactions</b></p> <ul style="list-style-type: none"> <li>Conventional Hydrogen Bond</li> <li>Pi-Sigma</li> <li>Pi-Pi Stacked</li> <li>Pi-Pi T-shaped</li> </ul>          |
| <p><b>o-Coumaric</b></p>                                                                                                                                                                                                        | <p><b>Kaempferol</b></p>                                                                                                                                                                                                                                              |
|  <p><b>Interactions</b></p> <ul style="list-style-type: none"> <li>Conventional Hydrogen Bond</li> <li>Pi-Sigma</li> <li>Pi-Alkyl</li> </ul> |  <p><b>Interactions</b></p> <ul style="list-style-type: none"> <li>Conventional Hydrogen Bond</li> <li>Pi-Pi Stacked</li> <li>Pi-Alkyl</li> <li>Pi-Donor Hydrogen Bond</li> </ul> |
| <p><b>Ferulic acid</b></p>                                                                                                                                                                                                      | <p><b>Quercetin</b></p>                                                                                                                                                                                                                                               |

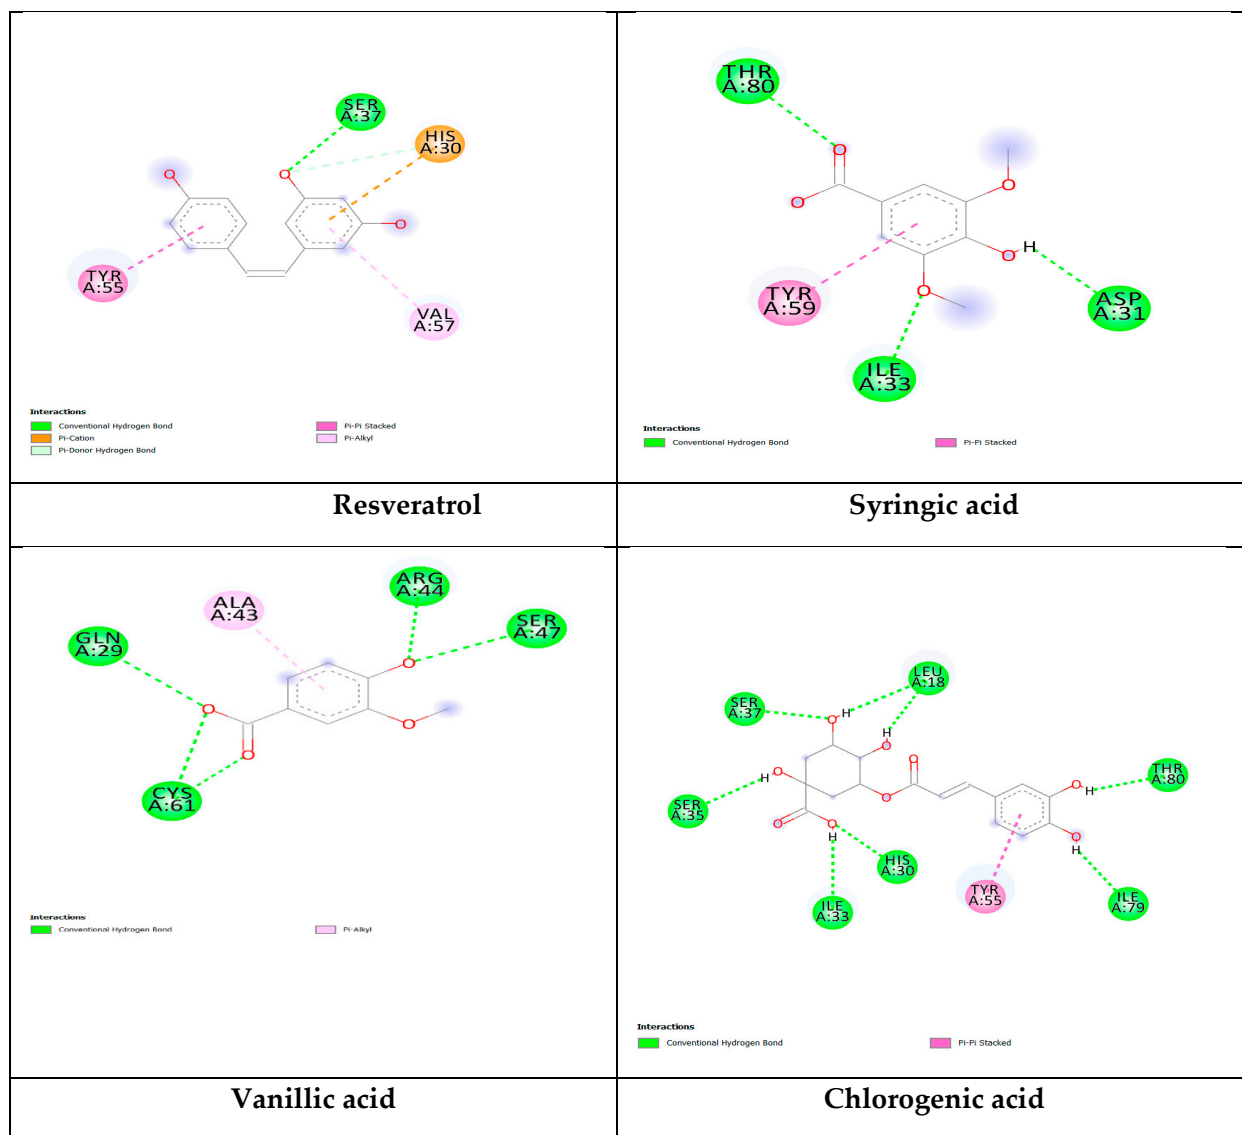

**Table S4.** Affinity scores for docking analysis of trypsin (PDB ID: 4DOQ) using twelve polyphenolic compounds identified from JRPE.



|                                                                                                                                                                                                                                                                                                                                     |                                                                                                                                                                                                                                                                                                                                      |
|-------------------------------------------------------------------------------------------------------------------------------------------------------------------------------------------------------------------------------------------------------------------------------------------------------------------------------------|--------------------------------------------------------------------------------------------------------------------------------------------------------------------------------------------------------------------------------------------------------------------------------------------------------------------------------------|
| 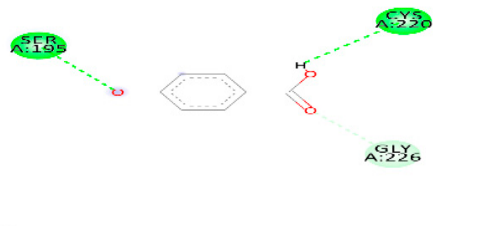 <p><b>Active site:</b></p> <ul style="list-style-type: none"> <li>SER A:19</li> <li>GLY A:226</li> </ul> <p><b>Interactions:</b></p> <ul style="list-style-type: none"> <li>Conventional hydrogen bond</li> <li>Carbon hydrogen bond</li> </ul>   |  <p><b>Active site:</b></p> <ul style="list-style-type: none"> <li>SER A:19</li> <li>GLY A:226</li> </ul> <p><b>Interactions:</b></p> <ul style="list-style-type: none"> <li>Conventional hydrogen bond</li> <li>Carbon hydrogen bond</li> </ul>   |
| <p><b><i>p</i>-Hydroxybenzoic acid</b></p>                                                                                                                                                                                                                                                                                          | <p><b>Caffeic acid</b></p>                                                                                                                                                                                                                                                                                                           |
|  <p><b>Active site:</b></p> <ul style="list-style-type: none"> <li>SER A:19</li> <li>GLY A:226</li> </ul> <p><b>Interactions:</b></p> <ul style="list-style-type: none"> <li>Conventional hydrogen bond</li> <li>Carbon hydrogen bond</li> </ul>   |  <p><b>Active site:</b></p> <ul style="list-style-type: none"> <li>SER A:19</li> <li>GLY A:226</li> </ul> <p><b>Interactions:</b></p> <ul style="list-style-type: none"> <li>Conventional hydrogen bond</li> <li>Carbon hydrogen bond</li> </ul>   |
| <p><b>Catechin</b></p>                                                                                                                                                                                                                                                                                                              | <p><b>Chlorogenic acid</b></p>                                                                                                                                                                                                                                                                                                       |
|  <p><b>Active site:</b></p> <ul style="list-style-type: none"> <li>SER A:19</li> <li>GLY A:226</li> </ul> <p><b>Interactions:</b></p> <ul style="list-style-type: none"> <li>Conventional hydrogen bond</li> <li>Carbon hydrogen bond</li> </ul> |  <p><b>Active site:</b></p> <ul style="list-style-type: none"> <li>SER A:19</li> <li>GLY A:226</li> </ul> <p><b>Interactions:</b></p> <ul style="list-style-type: none"> <li>Conventional hydrogen bond</li> <li>Carbon hydrogen bond</li> </ul> |
| <p><b>Ferulic</b></p>                                                                                                                                                                                                                                                                                                               | <p><b>Kaempferol</b></p>                                                                                                                                                                                                                                                                                                             |
|  <p><b>Active site:</b></p> <ul style="list-style-type: none"> <li>SER A:19</li> <li>GLY A:226</li> </ul> <p><b>Interactions:</b></p> <ul style="list-style-type: none"> <li>Conventional hydrogen bond</li> <li>Carbon hydrogen bond</li> </ul> |  <p><b>Active site:</b></p> <ul style="list-style-type: none"> <li>SER A:19</li> <li>GLY A:226</li> </ul> <p><b>Interactions:</b></p> <ul style="list-style-type: none"> <li>Conventional hydrogen bond</li> <li>Carbon hydrogen bond</li> </ul> |
| <p><b><i>o</i>-coumaric acid</b></p>                                                                                                                                                                                                                                                                                                | <p><b>Quercetin</b></p>                                                                                                                                                                                                                                                                                                              |

|                                                                                   |                                                                                    |
|-----------------------------------------------------------------------------------|------------------------------------------------------------------------------------|
| 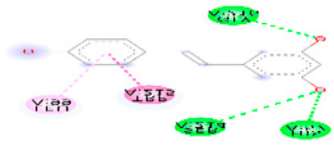 |  |
| <p>Resveratrol</p>                                                                | <p>Syringic acid</p>                                                               |
|  |  |
| <p>Vanillic acid</p>                                                              | <p><i>p</i>-Coumaric acid</p>                                                      |

**Table S5.** Pharmacodynamics and pharmacokinetics analysis of twelve polyphenolic compounds identified from JRPE.

| Compounds    | Pharmacokinetics                                                                                                                                                                                                          | Medicinal Chemistry                                                                                                           | Drug likeness                                                                                                                   | Physicochemical Properties                                                                                                                                                                                                                                                                                          | Lipophilicity                                                                                                                                              | Water Solubility                                                                                                                                                                                                                                                            |
|--------------|---------------------------------------------------------------------------------------------------------------------------------------------------------------------------------------------------------------------------|-------------------------------------------------------------------------------------------------------------------------------|---------------------------------------------------------------------------------------------------------------------------------|---------------------------------------------------------------------------------------------------------------------------------------------------------------------------------------------------------------------------------------------------------------------------------------------------------------------|------------------------------------------------------------------------------------------------------------------------------------------------------------|-----------------------------------------------------------------------------------------------------------------------------------------------------------------------------------------------------------------------------------------------------------------------------|
| Resveratrol  | GI absorption High<br>BBB permeant Yes<br>P-gp substrate No<br>CYP1A2 inhibitor Yes<br>CYP2C19 inhibitor No<br>CYP2C9 inhibitor Yes<br>CYP2D6 inhibitor No<br>CYP3A4 inhibitor Yes<br>Log Kp (skin permeation) -5.47 cm/s | PAINS 0 alert<br>Brenk 1 alert: stilbene<br>Leadlikeness No;<br>1 violation: MW<250<br>Synthetic accessibility 2.02           | Lipinski Yes; 0 violation<br>Ghose Yes<br>Veber Yes<br>Egan Yes<br>Muegge Yes<br>Bioavailability Score 0.55                     | Formula C <sub>14</sub> H <sub>12</sub> O <sub>3</sub><br>Molecular weight 228.24 g/mol<br>Num. heavy atoms 17<br>Num. arom. heavy atoms 12<br>Fraction Csp <sup>3</sup> 0.00<br>Num. rotatable bonds 2<br>Num. H-bond acceptors 3<br>Num. H-bond donors 3<br>Molar Refractivity 67.88<br>TPSA 60.69 Å <sup>2</sup> | Log Po/w (iLOGP) 1.71<br>Log Po/w (XLOGP3) 3.13<br>Log Po/w (WLOGP) 2.76<br>Log Po/w (MLOGP) 2.26<br>Log Po/w (SILICOS-IT) 2.57<br>Consensus Log Po/w 2.48 | Log S (ESOL) -3.62<br>Solubility 5.51e-02 mg/ml ; 2.41e-04 mol/l<br>Class Soluble<br>Log S (Ali) -4.07<br>Solubility 1.93e-02 mg/ml ; 8.44e-05 mol/l<br>Class Moderately soluble<br>Log S (SILICOS-IT) -3.29<br>Solubility 1.18e-01 mg/ml ; 5.16e-04 mol/l<br>Class Soluble |
| P-Coumarate  | GI absorption High<br>BBB permeant Yes<br>P-gp substrate No<br>CYP1A2 inhibitor No<br>CYP2C19 inhibitor No<br>CYP2C9 inhibitor No<br>CYP2D6 inhibitor No<br>CYP3A4 inhibitor No<br>Log Kp (skin permeation) -6.26 cm/s    | PAINS 0 alert<br>Brenk 1 alert: michael_acceptor_1<br>Leadlikeness No;<br>1 violation: MW<250<br>Synthetic accessibility 1.61 | Lipinski Yes; 0 violation<br>Ghose Yes<br>Veber Yes<br>Egan Yes<br>Muegge No; 1 violation: MW<200<br>Bioavailability Score 0.85 | Formula C <sub>9</sub> H <sub>8</sub> O <sub>3</sub><br>Molecular weight 164.16 g/mol<br>Num. heavy atoms 12<br>Num. arom. heavy atoms 6<br>Fraction Csp <sup>3</sup> 0.00<br>Num. rotatable bonds 2<br>Num. H-bond acceptors 3<br>Num. H-bond donors 2<br>Molar Refractivity 45.13<br>TPSA 57.53 Å <sup>2</sup>    | Log Po/w (iLOGP) 0.95<br>Log Po/w (XLOGP3) 1.46<br>Log Po/w (WLOGP) 1.38<br>Log Po/w (MLOGP) 1.28<br>Log Po/w (SILICOS-IT) 1.22<br>Consensus Log Po/w 1.26 | Log S (ESOL) -2.02<br>Solubility 1.58e+00 mg/ml ; 9.65e-03 mol/l<br>Class Soluble<br>Log S (Ali) -2.27<br>Solubility 8.73e-01 mg/ml ; 5.32e-03 mol/l<br>Class Soluble<br>Log S (SILICOS-IT) -1.28<br>Solubility 8.67e+00 mg/ml ; 5.28e-02 mol/l<br>Class Soluble            |
| Caffeic Acid | GI absorption High                                                                                                                                                                                                        | PAINS 1 alert:                                                                                                                | Lipinski Yes; 0 violation                                                                                                       | Formula C <sub>9</sub> H <sub>8</sub> O <sub>4</sub>                                                                                                                                                                                                                                                                | Log Po/w (iLOGP) 0.97                                                                                                                                      | Log S (ESOL) -1.89                                                                                                                                                                                                                                                          |

|          |                          |            |                                              |                       |                         |                        |              |                       |      |                    |                                 |
|----------|--------------------------|------------|----------------------------------------------|-----------------------|-------------------------|------------------------|--------------|-----------------------|------|--------------------|---------------------------------|
|          | BBB permeant             | No         | catechol_A                                   | Ghose                 | Yes                     | Molecular weight       | 180.16 g/mol | Log Po/w (XLOGP3)     | 1.15 | Solubility         | 2.32e+00 mg/ml ; 1.29e-02 mol/l |
|          | P-gp substrate           | No         | Brenk 2 alerts: catechol, michael_acceptor_1 | Veber                 | Yes                     | Num. heavy atoms       | 13           | Log Po/w (WLOGP)      | 1.09 | Class              | Very soluble                    |
|          | CYP1A2 inhibitor         | No         |                                              | Egan                  | Yes                     | Num. arom. heavy atoms | 6            | Log Po/w (MLOGP)      | 0.70 | Log S (Ali)        | -2.38                           |
|          | CYP2C19 inhibitor        | No         | Lead likeness No; 1 violation: MW<250        | Muegge                | No; 1 violation: MW<200 | Fraction Csp3          | 0.00         | Log Po/w (SILICOS-IT) | 0.75 | Solubility         | 7.55e-01 mg/ml ; 4.19e-03 mol/l |
|          | CYP2C9 inhibitor         | No         |                                              |                       |                         | Num. rotatable bonds   | 2            | Consensus Log Po/w    | 0.93 | Class              | Soluble                         |
|          | CYP2D6 inhibitor         | No         | Synthetic accessibility 1.81                 | Bioavailability Score | 0.56                    | Num. H-bond acceptors  | 4            |                       |      | Log S (SILICOS-IT) | -0.71                           |
|          | CYP3A4 inhibitor         | No         |                                              |                       |                         | Num. H-bond donors     | 3            |                       |      | Solubility         | 3.51e+01 mg/ml ; 1.95e-01 mol/l |
|          | Log Kp (skin permeation) | -6.58 cm/s |                                              |                       |                         | Molar Refractivity     | 47.16        |                       |      | Class              | Soluble                         |
|          |                          |            |                                              |                       |                         | TPSA                   | 77.76 Å²     |                       |      |                    |                                 |
| Catechin | GI absorption            | High       | PAINS 1 alert: catechol_A                    | Lipinski              | Yes; 0 violation        | Formula                | C15H14O6     | Log Po/w (iLOGP)      | 1.47 | Log S (ESOL)       | -2.22                           |
|          | BBB permeant             | No         | Brenk 1 alert: catechol                      | Ghose                 | Yes                     | Molecular weight       | 290.27 g/mol | Log Po/w (XLOGP3)     | 0.36 | Solubility         | 1.74e+00 mg/ml ; 5.98e-03 mol/l |
|          | P-gp substrate           | Yes        | Leadlikeness Yes                             | Veber                 | Yes                     | Num. heavy atoms       | 21           | Log Po/w (WLOGP)      | 1.22 | Class              | Soluble                         |
|          | CYP1A2 inhibitor         | No         |                                              | Egan                  | Yes                     | Num. arom. heavy atoms | 12           | Log Po/w (MLOGP)      | 0.24 | Log S (Ali)        | -2.24                           |
|          | CYP2C19 inhibitor        | No         | Synthetic accessibility 3.50                 | Muegge                | Yes                     | Fraction Csp3          | 0.20         | Log Po/w (SILICOS-IT) | 0.98 | Solubility         | 1.66e+00 mg/ml ; 5.72e-03 mol/l |
|          | CYP2C9 inhibitor         | No         |                                              | Bioavailability Score | 0.55                    | Num. rotatable bonds   | 1            | Consensus Log Po/w    | 0.85 | Class              | Soluble                         |
|          | CYP2D6 inhibitor         | No         |                                              |                       |                         | Num. H-bond acceptors  | 6            |                       |      | Log S (SILICOS-IT) | -2.14                           |
|          | CYP3A4 inhibitor         | No         |                                              |                       |                         | Num. H-bond donors     | 5            |                       |      | Solubility         | 2.09e+00 mg/ml ; 7.19e-03 mol/l |
|          | Log Kp (skin permeation) | -7.82 cm/s |                                              |                       |                         | Molar Refractivity     | 74.33        |                       |      | Class              | Soluble                         |
|          |                          |            |                                              |                       | TPSA                    | 110.38 Å²              |              |                       |      |                    |                                 |
| Ferulate | GI absorption            | High       | PAINS 0 alert                                | Lipinski              | Yes; 0 violation        | Formula                | C10H10O4     | Log Po/w (iLOGP)      | 1.62 | Log S (ESOL)       | -2.11                           |
|          | BBB permeant             | Yes        | Brenk 1 alert: michael_acceptor_1            | Ghose                 | Yes                     | Molecular weight       | 194.18 g/mol | Log Po/w (XLOGP3)     | 1.51 | Solubility         | 1.49e+00 mg/ml ; 7.68e-03 mol/l |
|          | P-gp substrate           | No         | Leadlikeness No; 1 violation: MW<250         | Veber                 | Yes                     | Num. heavy atoms       | 14           | Log Po/w (WLOGP)      | 1.39 | Class              | Soluble                         |
|          |                          |            |                                              | Egan                  | Yes                     | Num. arom. heavy atoms |              | Log Po/w (MLOGP)      | 1.00 |                    |                                 |

|            |                          |            |                         |                       |                       |                                     |                                                                                                  |                    |
|------------|--------------------------|------------|-------------------------|-----------------------|-----------------------|-------------------------------------|--------------------------------------------------------------------------------------------------|--------------------|
|            | CYP1A2 inhibitor         | No         | Synthetic accessibility | Muegge                | No; 1 violation:      | 6                                   | Log Po/w (SILICOS-IT)                                                                            | Log S (Ali) -2.52  |
|            | CYP2C19 inhibitor        | No         | 1.93                    | MW<200                |                       | Fraction Csp3                       | SILICOS-IT: Hybrid                                                                               | Solubility         |
|            | CYP2C9 inhibitor         | No         |                         | Bioavailability Score | 0.85                  | Num. rotatable bonds                | fragmental/topological                                                                           | mol/l              |
|            | CYP2D6 inhibitor         | No         |                         |                       |                       | Num. H-bond acceptors               | method calculated by                                                                             | Class              |
|            | CYP3A4 inhibitor         | No         |                         |                       |                       | 4                                   | FILTER-IT program, version                                                                       | Soluble            |
|            | Log Kp (skin permeation) | -6.41 cm/s |                         |                       |                       | Num. H-bond donors                  | 1.0.2, courtesy of SILICOS-IT, <a href="http://www.silicos-it.com">http://www.silicos-it.com</a> | Log S (SILICOS-IT) |
|            |                          |            |                         |                       |                       | Molar Refractivity                  | 1.26                                                                                             | -1.42              |
|            |                          |            |                         |                       |                       | TPSA                                | Consensus Log Po/w                                                                               | Solubility         |
|            |                          |            |                         |                       |                       |                                     | 1.36                                                                                             | mol/l              |
|            |                          |            |                         |                       |                       |                                     |                                                                                                  | Class              |
|            |                          |            |                         |                       |                       |                                     |                                                                                                  | Soluble            |
| Kaempferol | GI absorption            | High       | PAINS                   | 0 alert               | Lipinski              | Yes; 0 violation                    | Formula                                                                                          | Log S (ESOL)       |
|            | BBB permeant             | No         | Brenk                   | 0 alert               | Ghose                 | Yes                                 | Molecular weight                                                                                 | -3.31              |
|            | P-gp substrate           | No         | Leadlikeness            | Yes                   | Veber                 | Yes                                 | g/mol                                                                                            | Solubility         |
|            | CYP1A2 inhibitor         | Yes        | Synthetic accessibility | 3.14                  | Egan                  | Yes                                 | Num. heavy atoms                                                                                 | mol/l              |
|            | CYP2C19 inhibitor        | No         |                         |                       | Muegge                | Yes                                 | 16                                                                                               | Class              |
|            | CYP2C9 inhibitor         | No         |                         |                       | Bioavailability Score | 0.55                                | Num. arom. heavy atoms                                                                           | Soluble            |
|            | CYP2D6 inhibitor         | Yes        |                         |                       |                       |                                     | 16                                                                                               | Log S (Ali)        |
|            | CYP3A4 inhibitor         | Yes        |                         |                       |                       |                                     | Fraction Csp3                                                                                    | -3.86              |
|            | Log Kp (skin permeation) | -6.70 cm/s |                         |                       |                       |                                     | 0.00                                                                                             | Solubility         |
|            |                          |            |                         |                       |                       |                                     | Num. rotatable bonds                                                                             | mol/l              |
|            |                          |            |                         |                       |                       |                                     | 1                                                                                                | Class              |
|            |                          |            |                         |                       |                       |                                     | Num. H-bond acceptors                                                                            | Soluble            |
|            |                          |            |                         |                       |                       |                                     | 6                                                                                                | Log S (SILICOS-IT) |
|            |                          |            |                         |                       |                       |                                     | Num. H-bond donors                                                                               | -3.82              |
|            |                          |            |                         |                       |                       |                                     | 4                                                                                                | Solubility         |
|            |                          |            |                         |                       |                       |                                     | Molar Refractivity                                                                               | mol/l              |
|            |                          |            |                         |                       |                       |                                     | 76.01                                                                                            | Class              |
|            |                          |            |                         |                       |                       |                                     | TPSA                                                                                             | Soluble            |
|            |                          |            |                         |                       |                       |                                     | 111.13 Å²                                                                                        |                    |
| Quercetin  | GI absorption            | Low        | PAINS                   | 1 alert: catechol_A   | Lipinski              | No; 2 violations: NorO>10, NHorOH>5 | Formula                                                                                          | Log S (ESOL)       |
|            | BBB permeant             | No         | Brenk                   | 1 alert: catechol     | Ghose                 | Yes                                 | Molecular weight                                                                                 | -3.33              |
|            | P-gp substrate           | No         | Leadlikeness            | No;                   | Veber                 | No; 1 violation: TPSA>140           | g/mol                                                                                            | Solubility         |
|            | CYP1A2 inhibitor         | No         | 1 violation: MW>350     |                       | Egan                  | No; 1 violation: TPSA>131.6         | 448.38                                                                                           | mol/l              |
|            | CYP2C19 inhibitor        | No         | Synthetic accessibility | 5.28                  | Muegge                | No; 3 violations:                   | 32                                                                                               | Class              |
|            | CYP2C9 inhibitor         | No         |                         |                       |                       |                                     | Num. arom. heavy atoms                                                                           | Soluble            |
|            |                          |            |                         |                       |                       |                                     | 16                                                                                               | Log S (Ali)        |
|            |                          |            |                         |                       |                       |                                     | Fraction Csp3                                                                                    | -4.44              |
|            |                          |            |                         |                       |                       |                                     | 0.29                                                                                             | Solubility         |
|            |                          |            |                         |                       |                       |                                     |                                                                                                  | mol/l              |
|            |                          |            |                         |                       |                       |                                     |                                                                                                  |                    |

|                       |                                                                                                                                                                                                                      |                                                                                                                                                                       |                                                                                                                                                                                                         |                                                                                                                                                                                                                                                                   |                                                                                                                                                                 |                                                                                                                                                                                                                                                                       |
|-----------------------|----------------------------------------------------------------------------------------------------------------------------------------------------------------------------------------------------------------------|-----------------------------------------------------------------------------------------------------------------------------------------------------------------------|---------------------------------------------------------------------------------------------------------------------------------------------------------------------------------------------------------|-------------------------------------------------------------------------------------------------------------------------------------------------------------------------------------------------------------------------------------------------------------------|-----------------------------------------------------------------------------------------------------------------------------------------------------------------|-----------------------------------------------------------------------------------------------------------------------------------------------------------------------------------------------------------------------------------------------------------------------|
|                       | CYP2D6 inhibitor No<br>CYP3A4 inhibitor No<br>Log Kp (skin permeation) -8.42 cm/s                                                                                                                                    |                                                                                                                                                                       | TPSA>150, H-acc>10, H-don>5<br>Bioavailability Score 0.17                                                                                                                                               | Num. rotatable bonds 3<br>Num. H-bond acceptors 11<br>Num. H-bond donors 7<br>Molar Refractivity 109.00<br>TPSA 190.28 Å <sup>2</sup>                                                                                                                             | Consensus Log Po/w 0.22                                                                                                                                         | Class Moderately soluble<br>Log S (SILICOS-IT) -2.08<br>Solubility 3.69e+00 mg/ml ; 8.22e-03 mol/l<br>Class Soluble                                                                                                                                                   |
| Chlorogenic Acid      | GI absorption Low<br>BBB permeant No<br>P-gp substrate No<br>CYP1A2 inhibitor No<br>CYP2C19 inhibitor No<br>CYP2C9 inhibitor No<br>CYP2D6 inhibitor No<br>CYP3A4 inhibitor No<br>Log Kp (skin permeation) -8.62 cm/s | PAINS 1 alert: catechol_A<br>Brenk 3 alerts: catechol, michael_acceptor_1, more_than_2_esters<br>Leadlikeness No; 1 violation: MW>350<br>Synthetic accessibility 4.27 | Lipinski Yes; 0 violation<br>Ghose No; 1 violation: WLOGP<-0.4<br>Veber No; 1 violation: TPSA>140<br>Egan No; 1 violation: TPSA>131.6<br>Muegge No; 1 violation: TPSA>150<br>Bioavailability Score 0.55 | Formula C17H20O9<br>Molecular weight 368.34 g/mol<br>Num. heavy atoms 26<br>Num. arom. heavy atoms 6<br>Fraction Csp3 0.41<br>Num. rotatable bonds 6<br>Num. H-bond acceptors 9<br>Num. H-bond donors 5<br>Molar Refractivity 87.82<br>TPSA 153.75 Å <sup>2</sup> | Log Po/w (iLOGP) 1.64<br>Log Po/w (XLOGP3) -0.10<br>Log Po/w (WLOGP) -0.67<br>Log Po/w (MLOGP) -0.81<br>Log Po/w (SILICOS-IT) -0.07<br>Consensus Log Po/w -0.00 | Log S (ESOL) -1.84<br>Solubility 5.38e+00 mg/ml ; 1.46e-02 mol/l<br>Class Very soluble<br>Log S (Ali) -2.68<br>Solubility 7.76e-01 mg/ml ; 2.11e-03 mol/l<br>Class Soluble<br>Log S (SILICOS-IT) -0.29<br>Solubility 1.89e+02 mg/ml ; 5.13e-01 mol/l<br>Class Soluble |
| 4-Hydroxybenzoic acid | GI absorption High<br>BBB permeant Yes<br>P-gp substrate No<br>CYP1A2 inhibitor No<br>CYP2C19 inhibitor No<br>CYP2C9 inhibitor No<br>CYP2D6 inhibitor No<br>CYP3A4 inhibitor No                                      | PAINS 0 alert<br>Brenk 0 alert<br>Leadlikeness No; 1 violation: MW<250<br>Synthetic accessibility 1.00                                                                | Lipinski Yes; 0 violation<br>Ghose No; 3 violations: MW<160, MR<40, #atoms<20<br>Veber Yes<br>Egan Yes<br>Muegge No; 1 violation: MW<200<br>Bioavailability Score 0.85                                  | Formula C7H6O3<br>Molecular weight 138.12 g/mol<br>Num. heavy atoms 10<br>Num. arom. heavy atoms 6<br>Fraction Csp3 0.00<br>Num. rotatable bonds 1<br>Num. H-bond acceptors                                                                                       | Log Po/w (iLOGP) 0.85<br>Log Po/w (XLOGP3) 1.58<br>Log Po/w (WLOGP) 1.09<br>Log Po/w (MLOGP) 0.99<br>Log Po/w (SILICOS-IT) 0.74<br>Consensus Log Po/w 1.05      | Log S (ESOL) -2.07<br>Solubility 1.18e+00 mg/ml ; 8.52e-03 mol/l<br>Class Soluble<br>Log S (Ali) -2.40<br>Solubility 5.51e-01 mg/ml ; 3.99e-03 mol/l<br>Class Soluble                                                                                                 |

|                 |                                        |      |                                         |                                   |                                                                        |                            |                                                                                         |
|-----------------|----------------------------------------|------|-----------------------------------------|-----------------------------------|------------------------------------------------------------------------|----------------------------|-----------------------------------------------------------------------------------------|
|                 | Log Kp (skin permeation)<br>-6.02 cm/s |      |                                         |                                   | 3<br>Num. H-bond donors 2<br>Molar Refractivity 35.42<br>TPSA 57.53 Å² |                            | Log S (SILICOS-IT) -1.17<br>Solubility 9.40e+00 mg/ml ; 6.81e-02 mol/l<br>Class Soluble |
| o-Coumaric acid | GI absorption                          | High | PAINS 0 alert                           | Lipinski Yes; 0 violation         | Formula C9H8O3                                                         | Log Po/w (iLOGP) 1.09      | Log S (ESOL) -2.37                                                                      |
|                 | BBB permeant                           | Yes  | Brenk 1 alert:<br>michael_acceptor_1    | Ghose Yes                         | Molecular weight 164.16 g/mol                                          | Log Po/w (XLOGP3) 2.03     | Solubility 6.93e-01 mg/ml ; 4.22e-03 mol/l                                              |
|                 | P-gp substrate                         | No   | Leadlikeness No;<br>1 violation: MW<250 | Veber Yes                         | Num. heavy atoms 12                                                    | Log Po/w (WLOGP) 1.38      | Class Soluble                                                                           |
|                 | CYP1A2 inhibitor                       | No   | Synthetic accessibility 1.85            | Egan Yes                          | Num. arom. heavy atoms 6                                               | Log Po/w (MLOGP) 1.28      | Log S (Ali) -2.87                                                                       |
|                 | CYP2C19 inhibitor                      | No   |                                         | Muegge No; 1 violation:<br>MW<200 | Fraction Csp3 0.00                                                     | Log Po/w (SILICOS-IT) 1.22 | Solubility 2.24e-01 mg/ml ; 1.36e-03 mol/l                                              |
|                 | CYP2C9 inhibitor                       | No   |                                         | Bioavailability Score 0.85        | Num. rotatable bonds 2                                                 | Consensus Log Po/w 1.40    | Class Soluble                                                                           |
|                 | CYP2D6 inhibitor                       | No   |                                         |                                   | Num. H-bond acceptors 3                                                |                            | Log S (SILICOS-IT) -1.28                                                                |
|                 | CYP3A4 inhibitor                       | No   |                                         |                                   | Num. H-bond donors 2                                                   |                            | Solubility 8.67e+00 mg/ml ; 5.28e-02 mol/l                                              |
|                 | Log Kp (skin permeation)<br>-5.86 cm/s |      |                                         |                                   | Molar Refractivity 45.13                                               |                            | Class Soluble                                                                           |
| Vanillic acid   | GI absorption                          | High | PAINS 0 alert                           | Lipinski Yes; 0 violation         | Formula C8H8O4                                                         | Log Po/w (iLOGP) 1.40      | Log S (ESOL) -2.02                                                                      |
|                 | BBB permeant                           | No   | Brenk 0 alert                           | Ghose Yes                         | Molecular weight 168.15 g/mol                                          | Log Po/w (XLOGP3) 1.43     | Solubility 1.60e+00 mg/ml ; 9.52e-03 mol/l                                              |
|                 | P-gp substrate                         | No   | Leadlikeness No;<br>1 violation: MW<250 | Veber Yes                         | Num. heavy atoms 12                                                    | Log Po/w (WLOGP) 1.10      | Class Soluble                                                                           |
|                 | CYP1A2 inhibitor                       | No   | Synthetic accessibility 1.42            | Egan Yes                          | Num. arom. heavy atoms 6                                               | Log Po/w (MLOGP) 0.74      | Log S (Ali) -2.44                                                                       |
|                 | CYP2C19 inhibitor                      | No   |                                         | Muegge No; 1 violation:<br>MW<200 | Fraction Csp3 0.12                                                     | Log Po/w (SILICOS-IT) 0.73 | Solubility 6.15e-01 mg/ml ; 3.66e-03 mol/l                                              |
|                 | CYP2C9 inhibitor                       | No   |                                         | Bioavailability Score 0.85        | Num. rotatable bonds 2                                                 | Consensus Log Po/w 1.08    | Class Soluble                                                                           |
|                 | CYP2D6 inhibitor                       | No   |                                         |                                   | Num. H-bond acceptors 4                                                |                            | Log S (SILICOS-IT) -1.32                                                                |
|                 | CYP3A4 inhibitor                       | No   |                                         |                                   | Num. H-bond donors 2                                                   |                            | Solubility 8.10e+00 mg/ml ; 4.82e-02 mol/l                                              |
|                 | Log Kp (skin permeation)<br>-6.31 cm/s |      |                                         |                                   | Molar Refractivity 41.92                                               |                            | Class Soluble                                                                           |

|               |                                        |                                         |                                   |                                                       |                            |                                            |
|---------------|----------------------------------------|-----------------------------------------|-----------------------------------|-------------------------------------------------------|----------------------------|--------------------------------------------|
|               |                                        |                                         |                                   | TPSA 66.76 Å <sup>2</sup>                             |                            |                                            |
| Syringic acid | GI absorption<br>High                  | PAINS 0 alert                           | Lipinski Yes; 0 violation         | Formula C <sub>9</sub> H <sub>10</sub> O <sub>5</sub> | Log Po/w (iLOGP) 1.54      | Log S (ESOL) -1.84                         |
|               | BBB permeant No                        | Brenk 0 alert                           | Ghose Yes                         | Molecular weight 198.17 g/mol                         | Log Po/w (XLOGP3) 1.04     | Solubility 2.84e+00 mg/ml ; 1.44e-02 mol/l |
|               | P-gp substrate<br>No                   | Leadlikeness No;<br>1 violation: MW<250 | Veber Yes                         | Num. heavy atoms 14                                   | Log Po/w (WLOGP) 1.11      | Class Very soluble                         |
|               | CYP1A2 inhibitor No                    | Synthetic accessibility 1.70            | Egan Yes                          | Num. arom. heavy atoms 6                              | Log Po/w (MLOGP) 0.49      | Log S (Ali) -2.23                          |
|               | CYP2C19 inhibitor No                   |                                         | Muegge No; 1 violation:<br>MW<200 | Fraction Csp3 0.22                                    | Log Po/w (SILICOS-IT) 0.77 | Solubility 1.18e+00 mg/ml ; 5.94e-03 mol/l |
|               | CYP2C9 inhibitor No                    |                                         | Bioavailability Score 0.56        | Num. rotatable bonds 3                                | Consensus Log Po/w 0.99    | Class Soluble                              |
|               | CYP2D6 inhibitor No                    |                                         |                                   | Num. H-bond acceptors 5                               |                            | Log S (SILICOS-IT) -1.46                   |
|               | CYP3A4 inhibitor No                    |                                         |                                   | Num. H-bond donors 2                                  |                            | Solubility 6.93e+00 mg/ml ; 3.50e-02 mol/l |
|               | Log Kp (skin permeation)<br>-6.77 cm/s |                                         |                                   | Molar Refractivity 48.41                              |                            | Class Soluble                              |
|               |                                        |                                         |                                   | TPSA 75.99 Å <sup>2</sup>                             |                            |                                            |
